# Supplementary material for: Modulation of glucose metabolism by a natural compound from Chloranthus japonicus via activation of AMP-activated protein kinase
Source: PubMed Central journal article supplement (PMC5429703; doi:10.1038/s41598-017-00925-y), 2017-04-10

**Modulation of glucose metabolism by a natural compound from *Chloranthus japonicus* via activation of AMP-activated protein kinase**

Rongkuan Hu<sup>1,3</sup>, Huan Yan<sup>2</sup>, Xiaoyan Fei<sup>5</sup>, Haiyang Liu<sup>2\*</sup>, and Jiarui Wu<sup>1,3,4\*</sup>

<sup>1</sup>Hefei National Laboratory for Physical Sciences at Microscale and School of Life Sciences, University of Science & Technology of China, Hefei, 230027, China

<sup>2</sup>State Key Laboratory of Phytochemistry and Plant Resources in West China, Kunming Institute of Botany, Chinese Academy of Sciences, Kunming 650201, China

<sup>3</sup>Key Laboratory of Systems Biology, Institute of Biochemistry and Cell Biology, Shanghai Institutes for Biological Sciences, Chinese Academy of Sciences, Shanghai 200031, China

<sup>4</sup>School of Life Science and Technology, ShanghaiTech University. Shanghai 201210, China

<sup>5</sup>Department of Biochemistry, University of Texas Southwestern Medical Center, Dallas, TX 75390, USA

\* Corresponding authors:

Haiyang Liu: [haiyangliu@mail.kib.ac.cn](mailto:haiyangliu@mail.kib.ac.cn);

Jiarui Wu: [wujr@sibs.ac.cn](mailto:wujr@sibs.ac.cn)

## Supporting Information:

**Figure S1. The survival analysis of shizukaol F treated C2C12 cells and primary hepatocytes.** (A) Viability of C2C12 cells treated with shizukaol F at indicated concentrations for different time-points was analyzed by MTT assay. Result was normalized to DMSO group which is set as 100%. Error bars represent s.d. from three independent experiments. (B) Viability of primary liver cells treated with shizukaol F at indicated concentrations for different time-points was analyzed by MTT assay. Result was normalized to that of DMSO treated cells which is set as 100%. Error bars represent s.d. from three independent experiments. \*,  $P < 0.05$ ; \*\*,  $P < 0.01$  compared to corresponding controls (one way ANOVA).

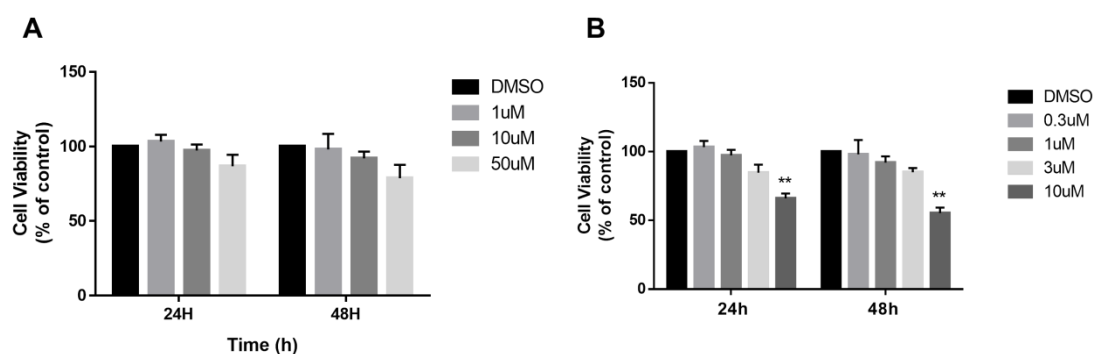

**Figure S2. C2C12 differentiation status detected by western.** C2C12 cells differentiation was stimulated by 2% horse serum (6 days) and then cells were photographed by fluo-microscopy (A). Two differentiated protein marker, myoD and myogenein, were detected by immunoblotting (B).

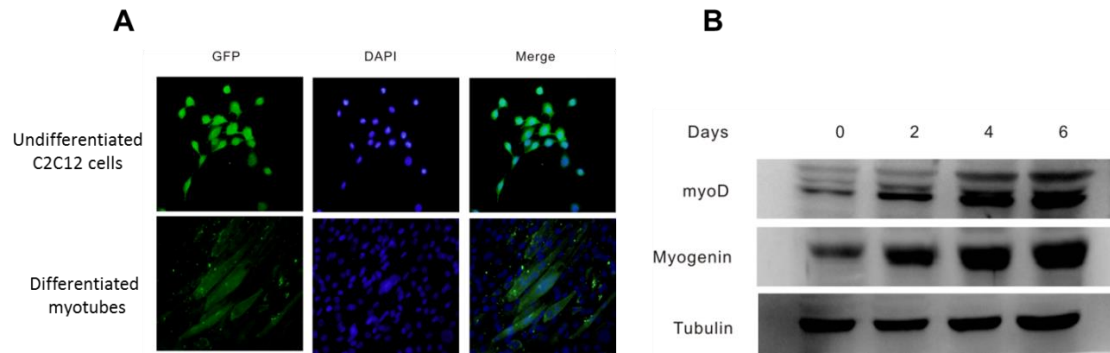

**Figure S3. Shizukaol F increases AMPKa phosphorylation in C2C12 cells and primary hepatocyte.** C2C12 cells were treated with shizukaol F at indicated concentrations, the phosphorylation levels of AMPKa (A), GLUT-4 translocation (B) and phosphorylated ACC were quantified (C). \*,  $P < 0.05$ ; \*\*,  $P < 0.01$  (one way ANOVA test),  $n = 3$  independent biological replicate experiments. (B) The phosphorylation level of AMPKa was quantified after treatment of shizukaol F in primary hepatocytes. \*\*,  $P < 0.01$  (one way ANOVA test),  $n = 3$  independent biological replicate experiments.

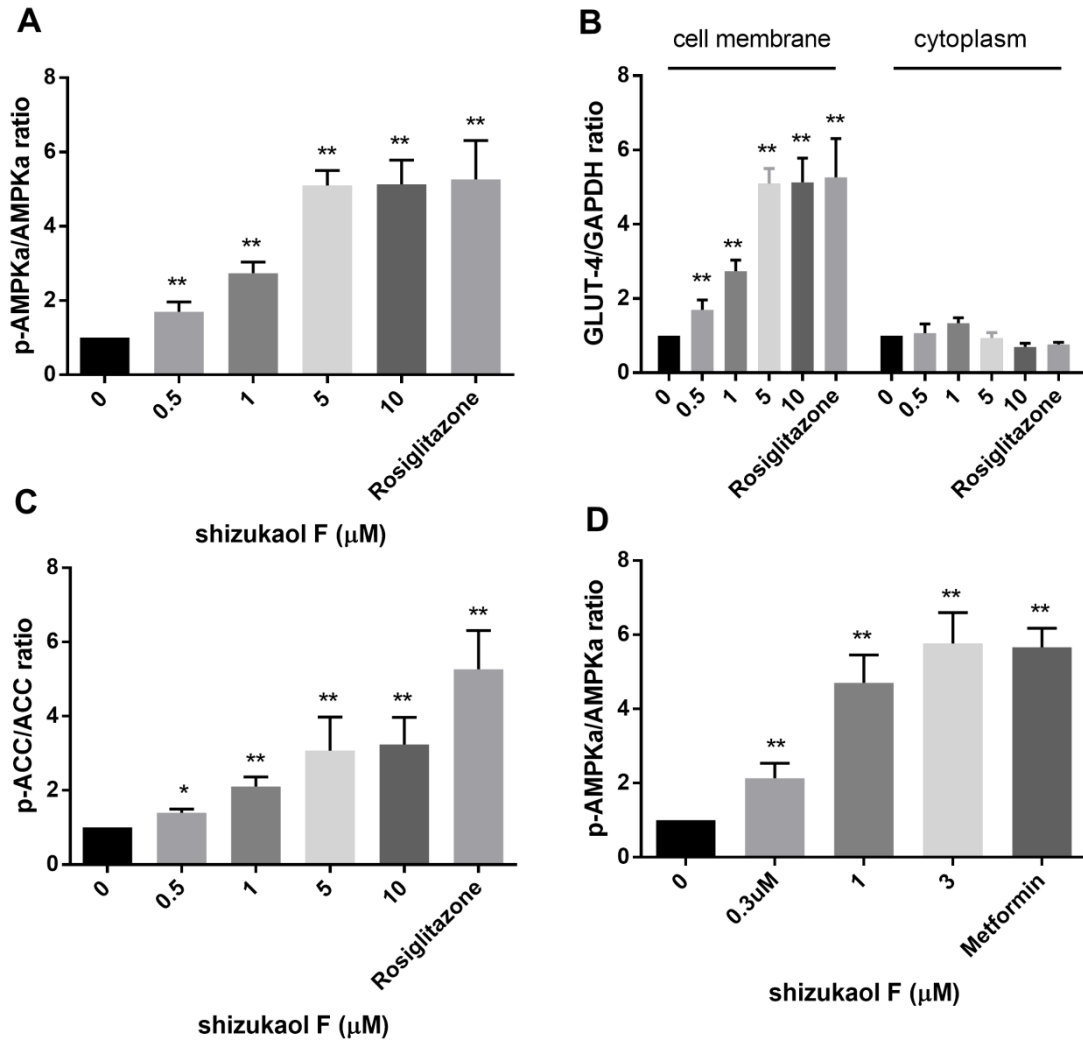

**Figure S4. AMPKa phosphorylation activity affects shizukaol F's function.**

C2C12 myotubes were pretreated with 20 μM AMPK inhibitor compound C, and followed by the treatment of 1 μM shizukaol F, the phosphorylation levels of AMPKa (A) and GLUT-4 translocation (B) were quantified. Primary hepatocytes were pretreated with 10 μM compound C, and followed by the incubation of 1 μM shizukaol F. Then the phosphorylation levels of AMPKa was quantified (C). PEPCK and G6Pase level were detected by q-PCR (D, E). \*\*, P<0.01(two-tailed Student t-test). n ≥ 3 independent biological replicate experiments.

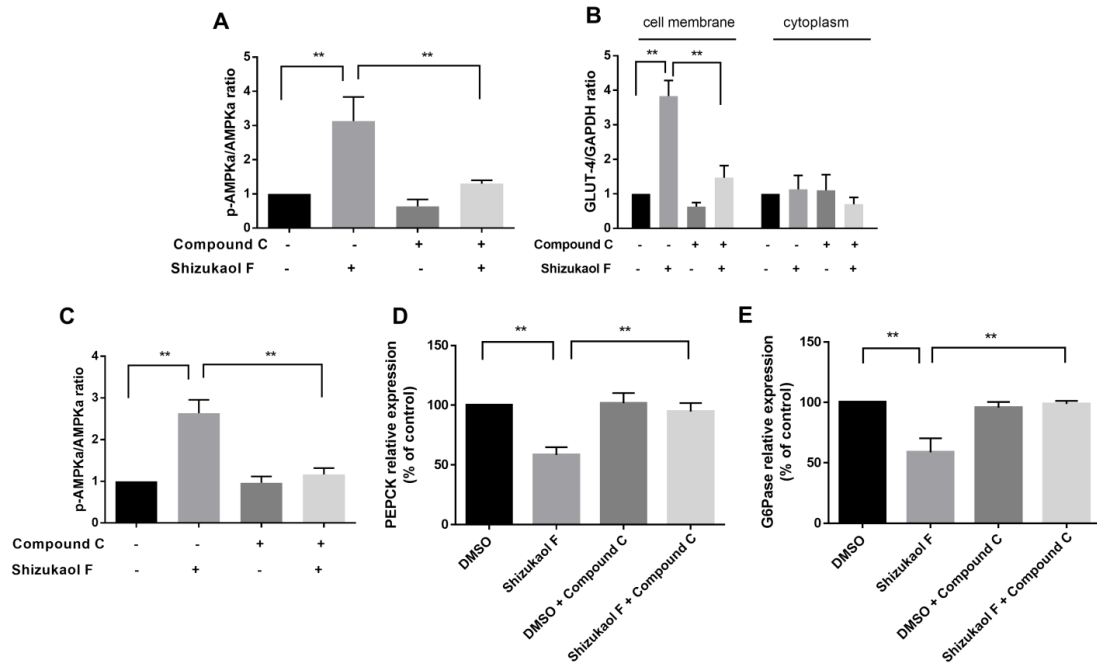

**Figure S5. Shizukaol F regulates glucose metabolism via AMPKa phosphorylation activity.** C2C12 myotubes infected by lenti-virus of shRNA-AMPKa1 were treated with 1  $\mu$ M shizukaol F. AMPKa1 relative ratio (A), AMPKa phosphorylation and GLUT-4 translocation were quantified (B). Primary hepatocytes were transfected with shRNA-AMPKa1 lenti-virus or a negative control. Cells were incubation with 1  $\mu$ M of shizukaol F for 24 h. AMPKa1 relative ratio and AMPKa phosphorylation were calculated (C). PEPCK and G6Pase level were detected by q-PCR (D, E). \*\*,  $P < 0.01$  (two-tailed Student t-test).  $n \geq 3$  independent biological replicate experiments.

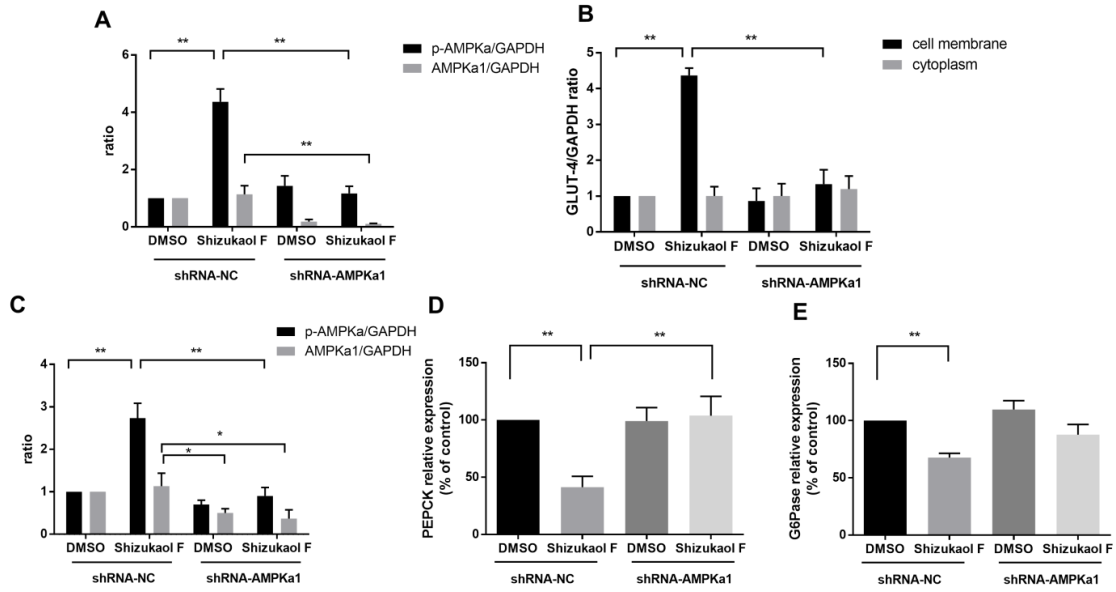

**Figure S6. Analysis of respiration in intact C2C12 cells or in mitochondria isolated from C57BL/6J mice.** (A) Metformin was set as control in cellular AMP/ATP ratio detection. (B) Rosiglitazone was set as control in cellular respiration analysis. By analyzing the ADP-stimulated respiration in the presence of complex I (glutamate + malate) or complex II (succinate) substrates in isolated mitochondria from HepG2 cells, rosiglitazone (C) was used as specific inhibitor for complex I. \*\*,  $P < 0.01$  (one way ANOVA),  $n = 3$  independent biological replicate experiments.

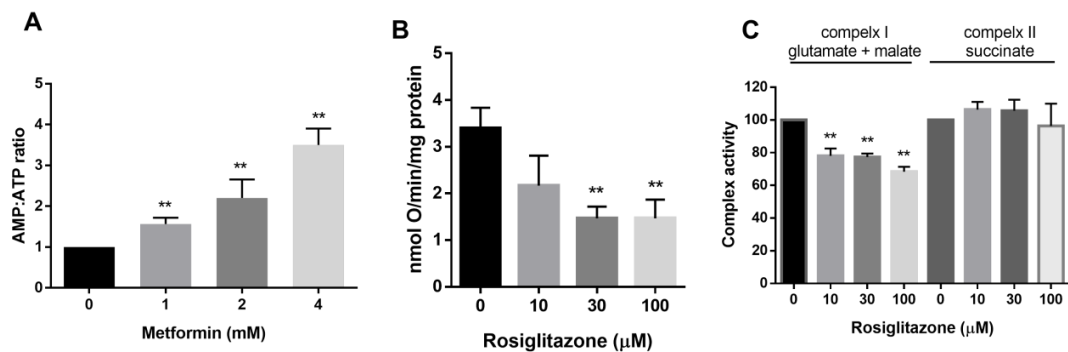

Supplement: 41598_2017_925_MOESM1_ESM.pdf [file 41598_2017_925_MOESM1_ESM.pdf]
